# Supplementary material for: Characterization of endogenous antioxidant attributes and its influence on thermal stability of canola oil
Source: Royal Society of Chemistry journal article supplement (doi:10.1039/c8ra02275e), 2018-01-01
Supplement: c8ra02275e1.pdf [file c8ra02275e1.pdf]

Fig. S1 Different content of individual phytosterols in two canola oils. Results were expressed as means  $\pm$  standard deviations. Different lowercase letters above the bar indicate a significant difference ( $P < 0.05$ ).

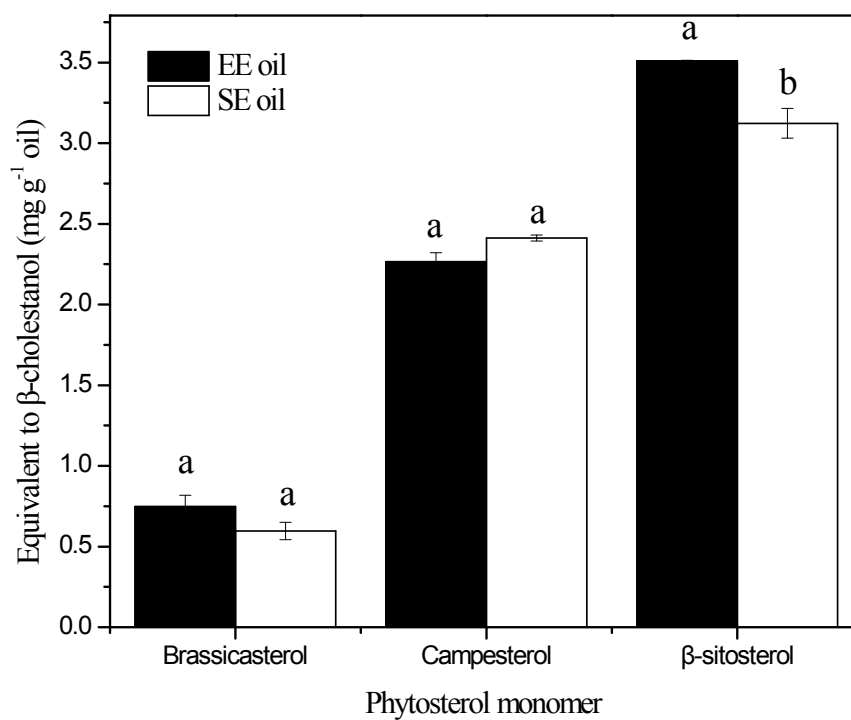

Table S1 Fatty acid composition of two canola oils at non-fried status (%).

| Fatty acid | EE oil                    | SE oil                    |
|------------|---------------------------|---------------------------|
| C14:0      | 0.08 ± 0.01 <sup>a</sup>  | 0.05 ± 0.02 <sup>a</sup>  |
| C15:0      | 0.03 ± 0.01 <sup>a</sup>  | 0.02 ± 0.01 <sup>a</sup>  |
| C16:0      | 4.01 ± 0.46 <sup>a</sup>  | 3.90 ± 0.04 <sup>a</sup>  |
| C16:1      | 0.31 ± 0.04 <sup>a</sup>  | 0.30 ± 0.01 <sup>a</sup>  |
| C17:0      | 0.09 ± 0.01 <sup>a</sup>  | 0.08 ± 0.01 <sup>a</sup>  |
| C18:0      | 2.64 ± 0.30 <sup>a</sup>  | 2.26 ± 0.22 <sup>a</sup>  |
| C18:1      | 59.47 ± 4.15 <sup>a</sup> | 69.39 ± 1.53 <sup>a</sup> |
| C18:2      | 22.06 ± 0.32 <sup>a</sup> | 18.01 ± 0.62 <sup>b</sup> |
| C20:0      | 0.91 ± 0.11 <sup>a</sup>  | 0.61 ± 0.06 <sup>a</sup>  |
| C22:0      | 0.45 ± 0.05 <sup>a</sup>  | 0.29 ± 0.01 <sup>b</sup>  |
| C24:0      | 0.16 ± 0.03 <sup>a</sup>  | 0.14 ± 0.03 <sup>a</sup>  |
| ΣSFA       | 8.36 ± 0.97 <sup>a</sup>  | 7.35 ± 0.38 <sup>a</sup>  |
| ΣMUFA      | 61.76 ± 3.87 <sup>a</sup> | 71.05 ± 1.62 <sup>a</sup> |
| ΣPUFA      | 22.41 ± 0.36 <sup>a</sup> | 18.30 ± 0.67 <sup>b</sup> |

Values are expressed as means ± standard deviations (n = 3). Different letters are significant in the same column at  $P < 0.05$ . SFA: saturated fatty acid, MUFA: monounsaturated fatty acids, PUFA: polyunsaturated fatty acids;
